# Supplementary material
Source: Research Square preprint supplement (doi:10.21203/rs.3.rs-9323492/v1)
Supplement: Supplementary file 1 [file eecfddeea10a833318d4ed17.pdf]

**Supplementary information**

**for**

**Accelerating urbanization drives physical isolation of global protected area networks**

Rakibul Ahasan<sup>1, a, #</sup>, Burak Güneralp<sup>1</sup>

<sup>1</sup> Department of Geography, Texas A&M University, College Station, TX 77843.

<sup>a</sup> Current address: Environmental Systems Research Institute (Esri), Redlands, CA 92373.

<sup>#</sup> Corresponding author: Rakibul Ahasan ([rahasan@tamu.edu](mailto:rahasan@tamu.edu))

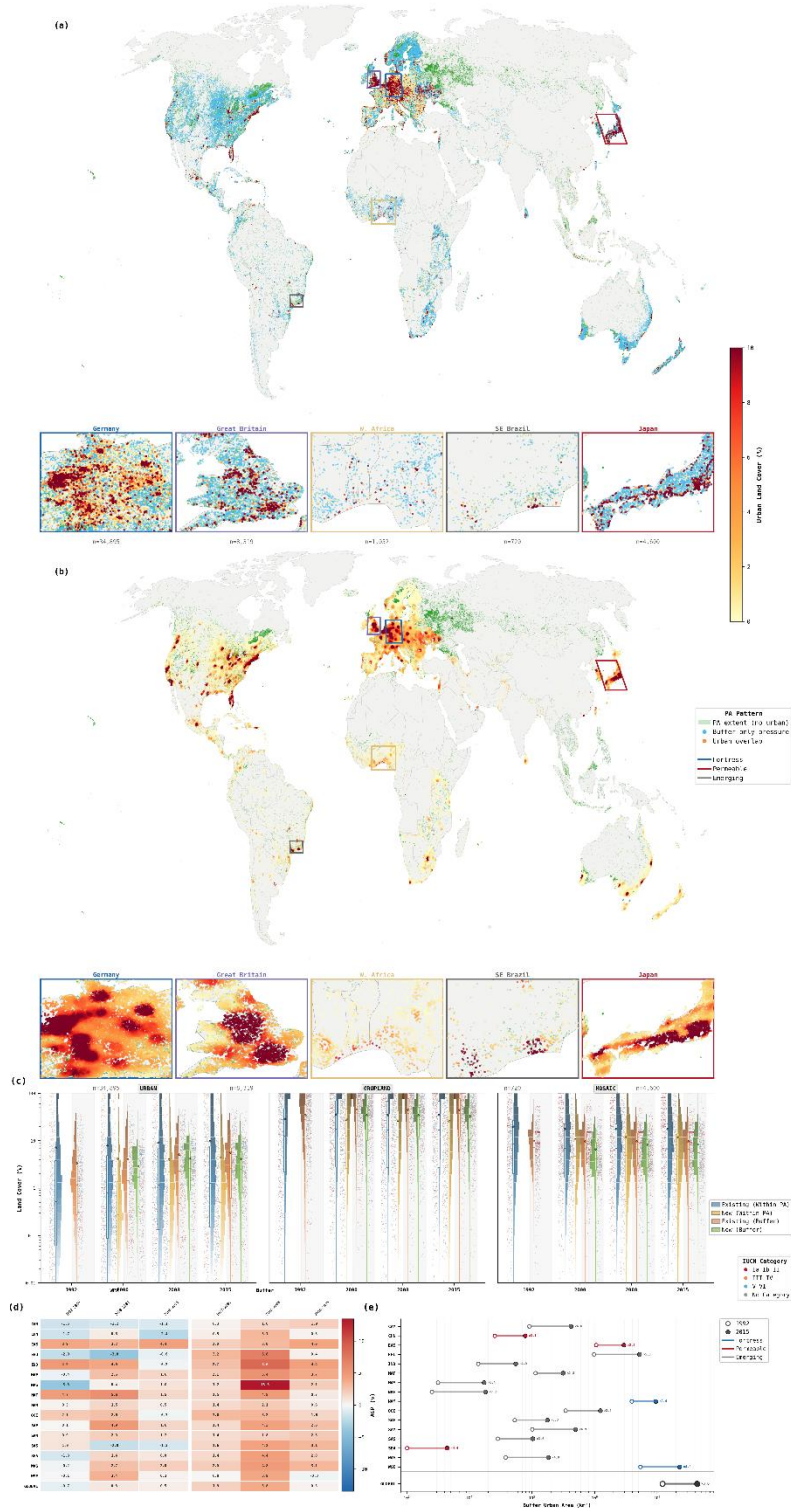

**Figure S1. Composite overview of urban encroachment on the global protected area network, 1992–2015:** (a) percentage of urban land cover within PA boundaries (2015), (b) percentage of urban land cover within the 50-km buffer zone (2015), (c) distribution of urban, cropland, and mosaic land cover (% , log scale) by designation cohort and zone, with gradient-colored frequency bars, boxplots, and IUCN-coded jittered points, (d) annual Growth Percentage of urban land cover by IPBES region and period for within-PA and buffer zones, and (e) total buffer urban area in 1992 and 2015 by region, with growth factors.

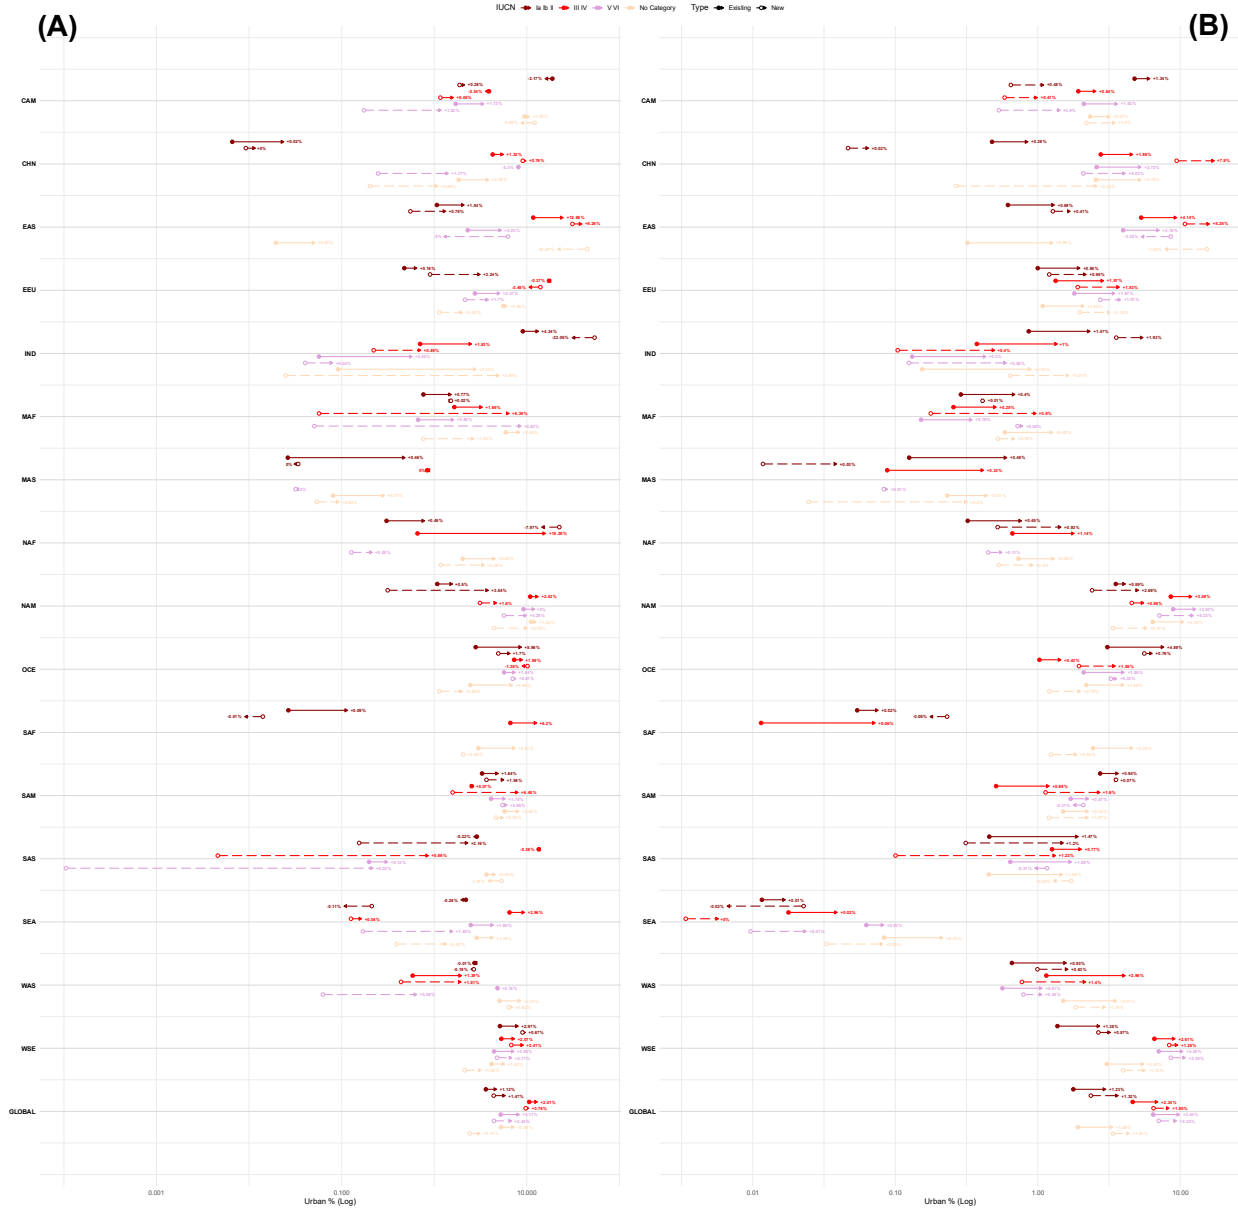

**Figure S2. Urbanization trajectories (A) within protected areas and (B) surrounding buffer zones in 16 regions and globally.** The plot illustrates mean urban land cover change (%) from 1992 to 2015 within protected areas and 50-km buffer zones, stratified by IUCN category. Each line traces the shift in mean urban density, with the tail representing the 1992 baseline and the head representing the 2015 state. The solid lines with a solid start point indicate the changes in *existing* PAs and the dashed lines with a hollow start point indicate changes within *new* PAs. The arrow indicates the direction of change between 1992 and 2015.

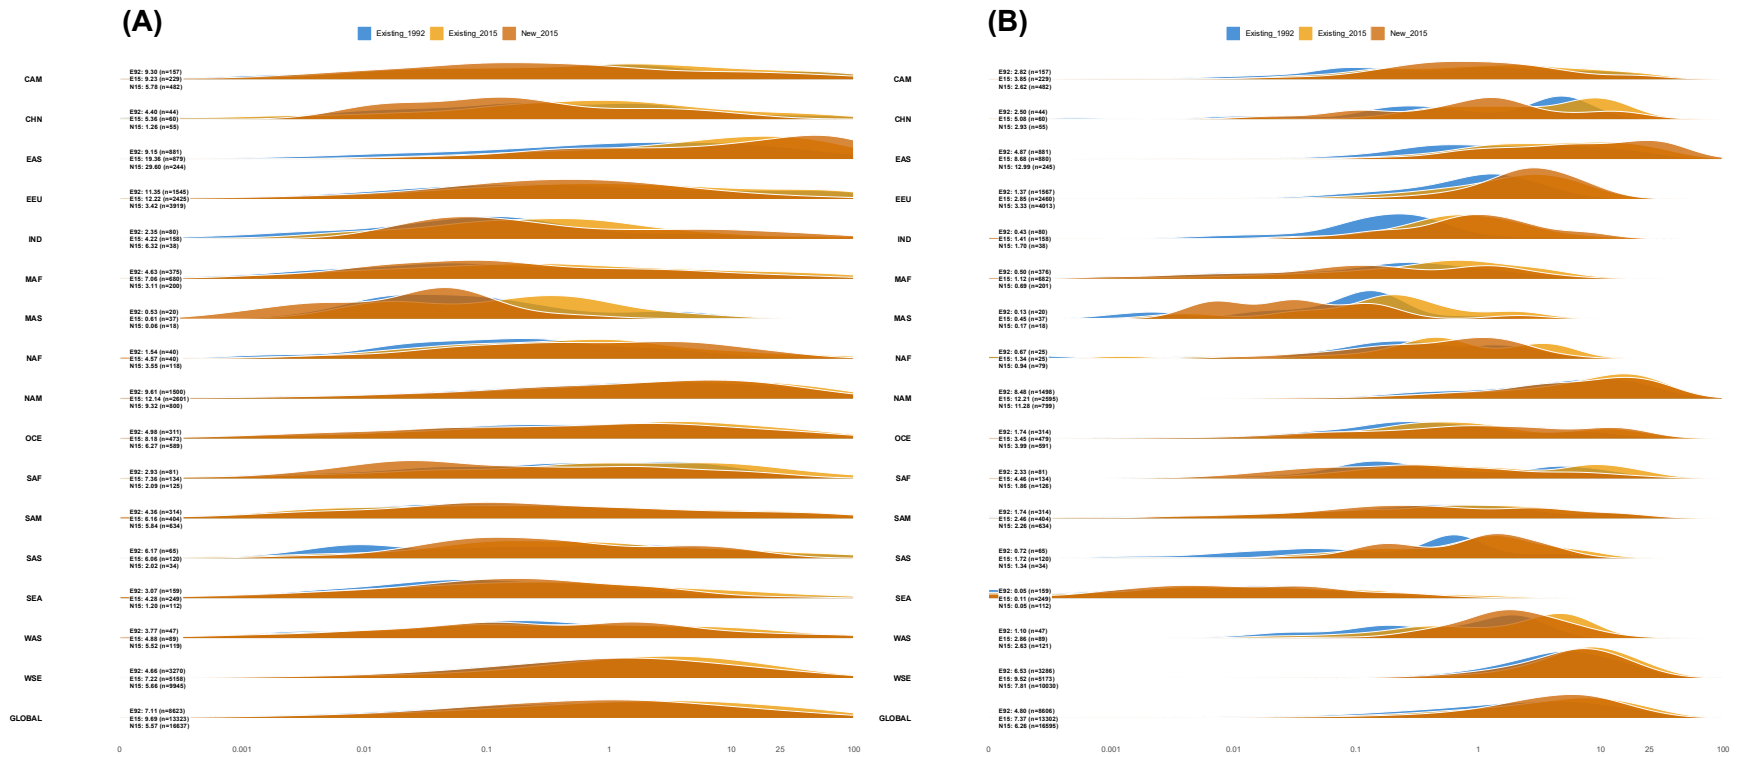

**Figure S3. Differential urbanization pressure on existing versus new protected areas:** existing PAs in 1992 (shown in Blue), new PAs in 2015 (shown in Orange), and existing PAs in 2015 (shown in Gold). Temporal density plots illustrates the percentage of urban land cover (A) within PAs and (B) within 50-km buffer around *existing* protected areas (designated pre-1992, blue). Data are aggregated by region and year (1992, 2000, 2008, 2015).

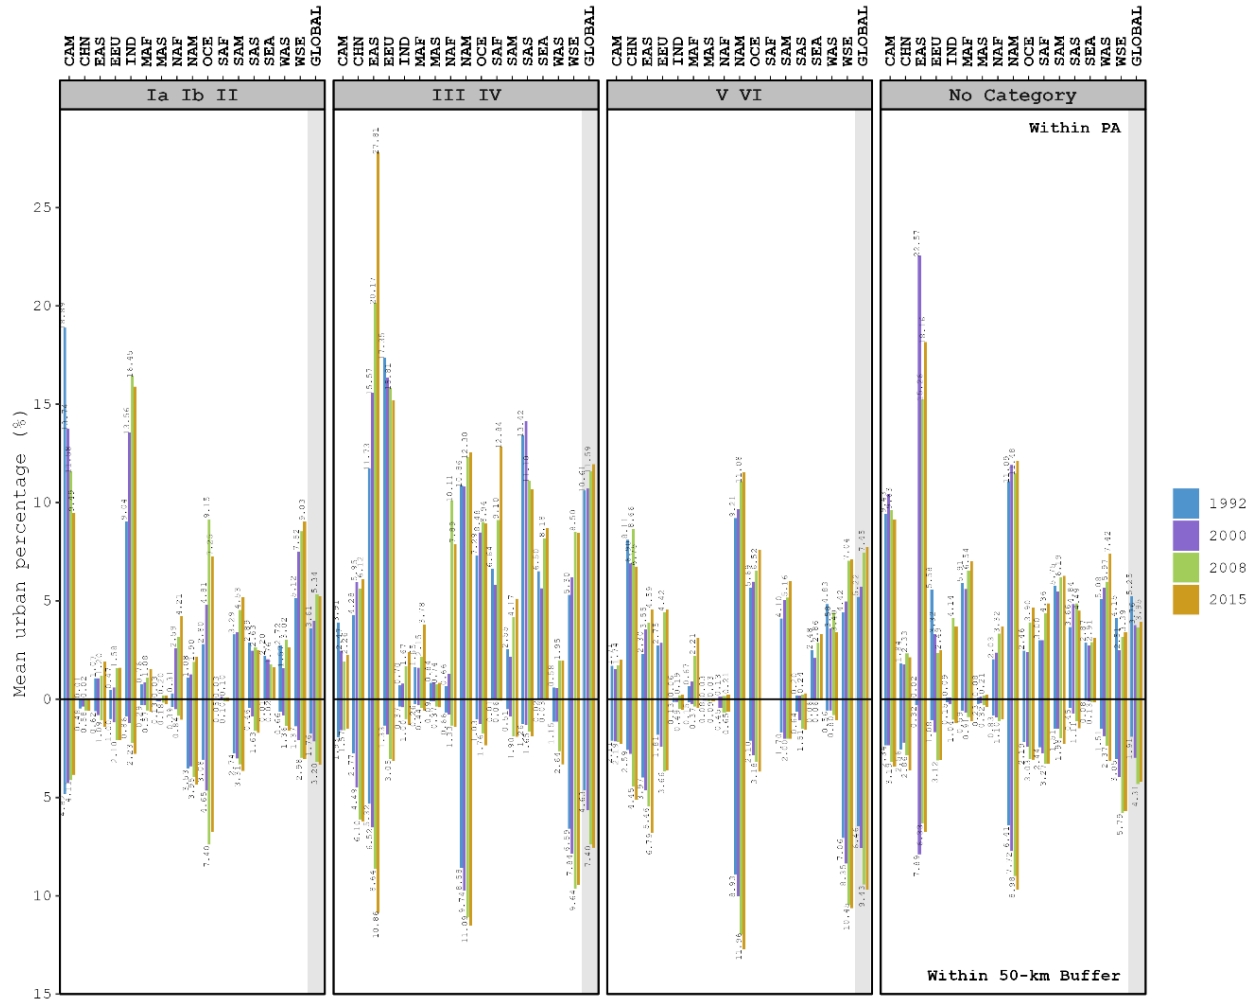

**Figure S4. Spatiotemporal trends in mean urban land cover stratified by IUCN management category.** The grouped bars illustrate the mean urban land cover percentage from 1992 to 2015 for (Top) within protected area boundaries (positive y-axis) and (Bottom) within the 50-km exclusive buffer zone (negative y-axis). The data are faceted by IUCN category: Strict Nature Reserves and National Parks (Ia, Ib, II); Natural Monuments and Habitat Management Areas (III, IV); Protected Landscapes and Seascapes (Sustainable Use, V, VI); and Reserves with No Category (No Category).

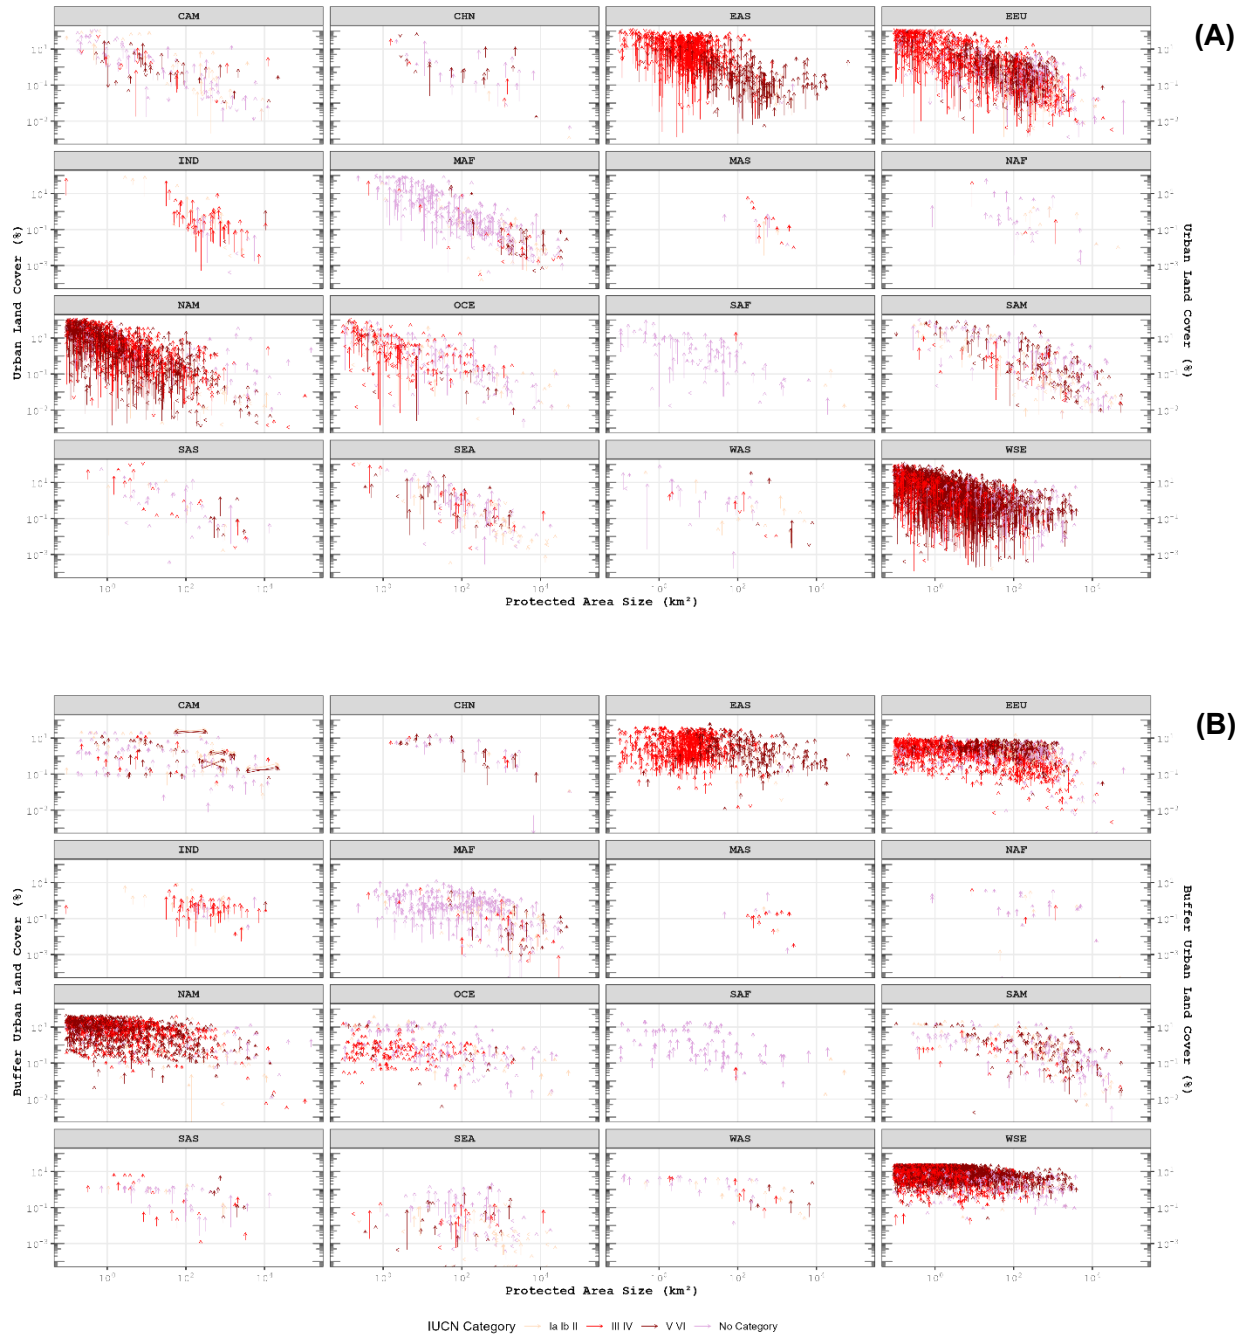

**Figure S5. Divergent trajectories of protected area isolation (1992–2015).** The plot displays spatiotemporal evolution of mean urban land cover (%): (A) within protected area boundaries and (B) within the 50-km buffer zone. Each arrow represents the trajectory of urban land changes for specific PAs from 1992 (tail) to 2015 (head).

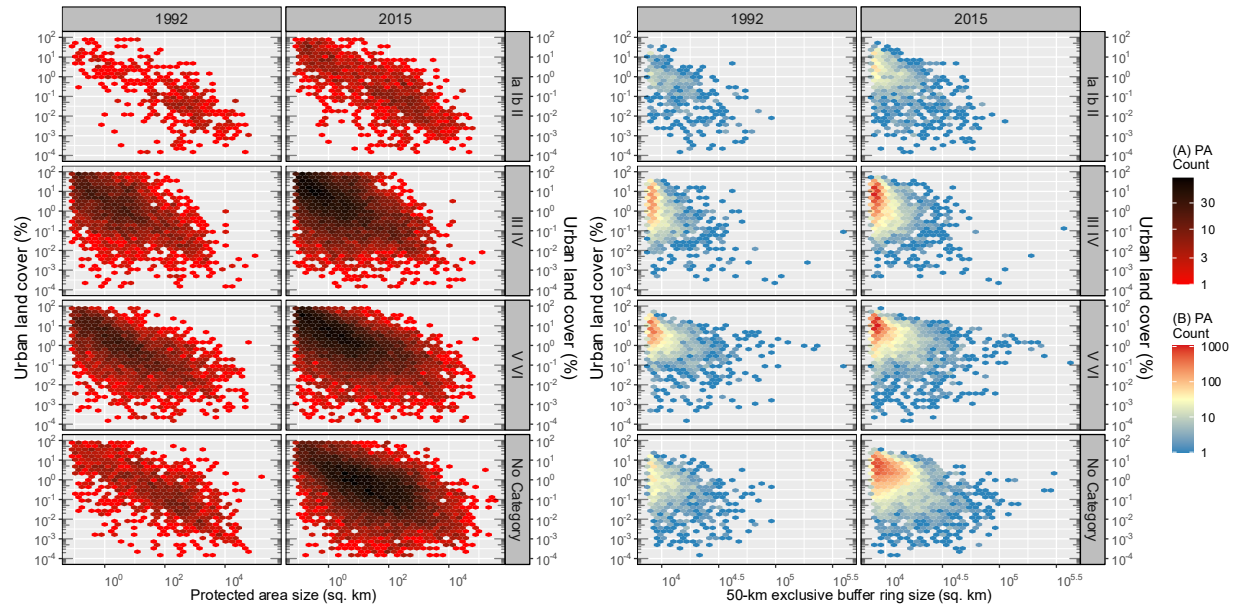

**Figure S6. The size-dependent vulnerability of protected areas to urbanization, stratified by IUCN management category.** The relationship between protected area size (km<sup>2</sup>, log-transformed) and the percentage of urban land cover (% , log-transformed) is shown for (A) within protected area boundaries and (B) within the 50-km exclusive buffer zone. The data are stratified by IUCN category. The color gradient represents the density of protected areas within each hexagonal bin (count).

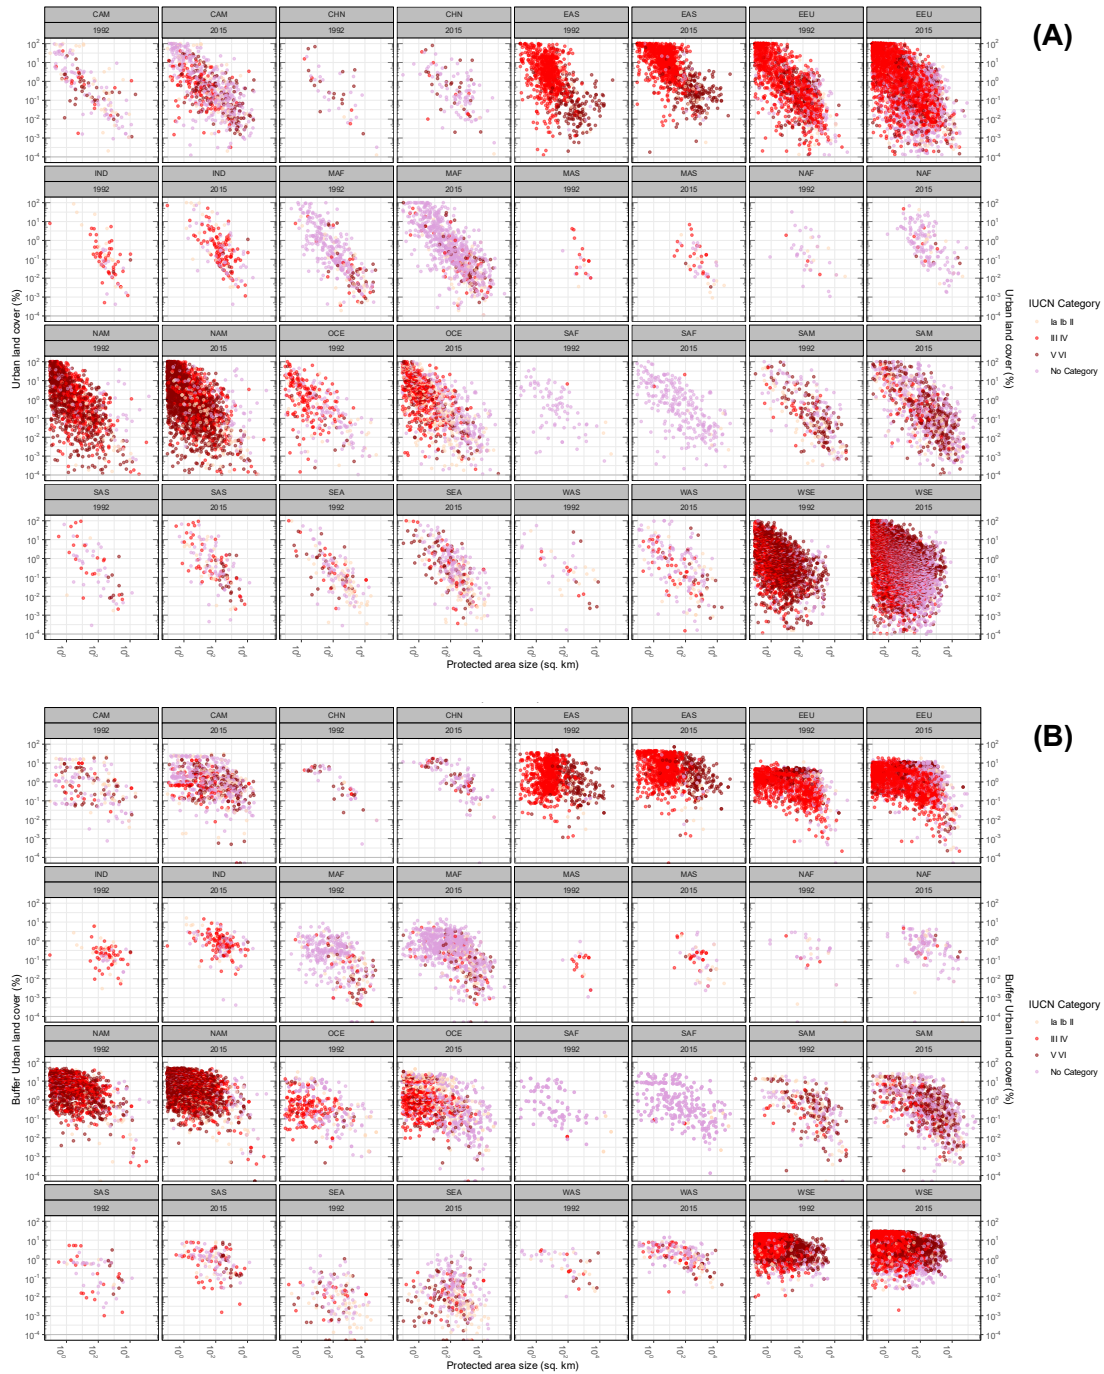

**Figure S7. The size-dependent vulnerability of protected areas to urbanization.** The relationship between protected area size ( $\text{km}^2$ , log-transformed) and urban land cover percentage (% , log-transformed) for: **(A)** within protected area boundaries and **(B)** within the 50-km buffer zone. Each point represents an individual protected area.

**Table S1.** Mean urban land cover percentage within protected areas (PAs) and within 50-km buffer around the PAs, stratified by IUCN Category

| Region | IUCN Category | Mean urban land cover (%) |        |        |        |                     |       |       |       |
|--------|---------------|---------------------------|--------|--------|--------|---------------------|-------|-------|-------|
|        |               | Within Protected Area     |        |        |        | Within 50-km buffer |       |       |       |
|        |               | 1992                      | 2000   | 2008   | 2015   | 1992                | 2000  | 2008  | 2015  |
| CAM    | Ia Ib II      | 18.890                    | 13.742 | 11.577 | 9.493  | 1.720               | 1.745 | 1.611 | 1.715 |
|        | III IV        | 3.906                     | 2.475  | 1.920  | 2.257  | 0.532               | 0.602 | 0.718 | 0.911 |
|        | V VI          | 1.706                     | 1.543  | 1.740  | 2.006  | 1.259               | 1.330 | 1.200 | 1.396 |
|        | No category   | 9.431                     | 10.438 | 9.627  | 9.159  | 1.046               | 1.163 | 1.702 | 2.008 |
| CHN    | Ia Ib II      | 0.007                     | 0.007  | 0.016  | 0.020  | 0.196               | 0.145 | 0.207 | 0.193 |
|        | III IV        | 4.276                     | 5.952  | 5.629  | 6.122  | 3.490               | 3.846 | 6.162 | 6.546 |
|        | V VI          | 8.114                     | 6.899  | 8.660  | 6.747  | 2.628               | 2.750 | 4.206 | 4.179 |
|        | No category   | 1.840                     | 1.777  | 2.331  | 2.133  | 2.977               | 3.236 | 3.534 | 3.694 |
| EAS    | Ia Ib II      | 1.068                     | 1.075  | 1.198  | 1.906  | 0.638               | 0.771 | 1.177 | 1.775 |
|        | III IV        | 11.731                    | 15.568 | 20.168 | 27.809 | 2.807               | 3.336 | 4.383 | 5.854 |
|        | V VI          | 2.299                     | 3.553  | 3.890  | 4.585  | 3.585               | 3.947 | 4.604 | 5.894 |
|        | No category   | 0.020                     | 22.574 | 15.257 | 18.162 | 0.470               | 2.751 | 2.352 | 3.696 |
| EEU    | Ia Ib II      | 0.475                     | 0.589  | 1.583  | 1.599  | 0.818               | 0.876 | 1.650 | 1.638 |
|        | III IV        | 17.345                    | 16.339 | 15.809 | 15.203 | 1.000               | 1.267 | 2.052 | 2.149 |
|        | V VI          | 2.750                     | 2.865  | 4.424  | 4.566  | 1.204               | 1.495 | 1.909 | 1.949 |
|        | No category   | 5.576                     | 3.315  | 2.354  | 2.491  | 0.690               | 1.082 | 2.262 | 2.272 |
| IND    | Ia Ib II      | 9.044                     | 13.558 | 16.453 | 15.888 | 0.387               | 0.536 | 0.821 | 1.083 |
|        | III IV        | 0.703                     | 0.792  | 1.673  | 2.400  | 0.272               | 0.321 | 0.630 | 0.855 |
|        | V VI          | 0.057                     | 0.061  | 0.189  | 0.246  | 0.108               | 0.096 | 0.304 | 0.425 |
|        | No category   | 0.091                     | 0.090  | 4.139  | 3.708  | 0.163               | 0.202 | 0.566 | 0.778 |
| MAF    | Ia Ib II      | 0.764                     | 0.848  | 1.077  | 1.533  | 0.160               | 0.190 | 0.284 | 0.376 |
|        | III IV        | 1.647                     | 1.591  | 2.154  | 3.779  | 0.163               | 0.196 | 0.298 | 0.385 |
|        | V VI          | 5.910                     | 5.601  | 6.543  | 7.013  | 0.267               | 0.317 | 0.481 | 0.620 |
|        | No category   | 0.669                     | 0.898  | 2.210  | 3.112  | 0.147               | 0.175 | 0.255 | 0.317 |
| MAS    | Ia Ib II      | 0.026                     | 0.033  | 0.202  | 0.205  | 0.102               | 0.107 | 0.268 | 0.313 |
|        | III IV        | 0.839                     | 0.847  | 0.741  | 0.835  | 0.073               | 0.086 | 0.281 | 0.348 |
|        | V VI          | -                         | 0.032  | 0.032  | 0.032  | 0.005               | 0.017 | 0.023 | 0.039 |
|        | No category   | 0.081                     | 0.124  | 0.206  | 0.212  | 0.073               | 0.079 | 0.180 | 0.208 |
| NAF    | Ia Ib II      | 0.306                     | 2.590  | 3.176  | 4.211  | 0.359               | 0.503 | 0.762 | 0.963 |
|        | III IV        | 0.660                     | 1.283  | 10.114 | 7.887  | 0.527               | 0.612 | 1.046 | 1.085 |
|        | V VI          | -                         | 0.127  | 0.160  | 0.214  | -                   | 0.408 | 0.612 | 0.709 |
|        | No category   | 2.029                     | 2.373  | 3.324  | 3.694  | 0.665               | 0.623 | 0.879 | 0.946 |
| NAM    | Ia Ib II      | 1.077                     | 1.261  | 1.904  | 2.141  | 0.588               | 0.652 | 0.728 | 0.791 |
|        | III IV        | 10.863                    | 10.799 | 12.298 | 12.556 | 4.143               | 4.562 | 4.327 | 3.230 |
|        | V VI          | 9.205                     | 9.654  | 11.079 | 11.564 | 2.712               | 3.087 | 3.883 | 4.287 |
|        | No category   | 11.086                    | 11.914 | 11.478 | 12.114 | 5.705               | 6.601 | 7.492 | 7.422 |
| OCE    | Ia Ib II      | 2.804                     | 4.809  | 9.155  | 7.250  | 0.621               | 0.784 | 1.219 | 1.271 |
|        | III IV        | 7.293                     | 8.483  | 9.014  | 8.942  | 0.558               | 0.719 | 0.821 | 0.929 |
|        | V VI          | 5.688                     | 5.985  | 6.524  | 7.602  | 0.587               | 0.970 | 1.051 | 1.223 |
|        | No category   | 2.457                     | 2.380  | 3.901  | 4.646  | 0.628               | 0.689 | 0.887 | 1.043 |
| SAF    | Ia Ib II      | 0.027                     | 0.116  | 0.096  | 0.080  | 0.101               | 0.127 | 0.174 | 0.240 |
|        | III IV        | 6.644                     | 5.809  | 9.105  | 12.840 | 0.291               | 0.364 | 0.390 | 0.671 |
|        | V VI          | -                         | -      | -      | -      | 0.063               | 0.090 | 0.092 | 0.564 |

| Region | IUCN Category | Mean urban land cover (%) |        |        |        |                     |       |       |       |
|--------|---------------|---------------------------|--------|--------|--------|---------------------|-------|-------|-------|
|        |               | Within Protected Area     |        |        |        | Within 50-km buffer |       |       |       |
|        |               | 1992                      | 2000   | 2008   | 2015   | 1992                | 2000  | 2008  | 2015  |
|        | No category   | 2.997                     | 2.994  | 4.364  | 4.867  | 0.650               | 0.717 | 0.965 | 1.177 |
| SAM    | Ia Ib II      | 3.285                     | 3.389  | 4.534  | 5.195  | 0.930               | 1.035 | 1.243 | 1.527 |
|        | III IV        | 2.548                     | 2.161  | 4.165  | 5.114  | 0.433               | 0.541 | 0.910 | 1.047 |
|        | V VI          | 4.103                     | 5.040  | 5.162  | 5.998  | 0.945               | 1.100 | 1.094 | 1.139 |
|        | No category   | 5.754                     | 5.474  | 6.190  | 6.264  | 0.800               | 0.861 | 1.036 | 1.297 |
| SAS    | Ia Ib II      | 2.887                     | 2.466  | 2.629  | 2.491  | 0.711               | 0.796 | 1.089 | 1.197 |
|        | III IV        | 13.418                    | 14.136 | 11.096 | 10.664 | 0.361               | 0.424 | 0.589 | 0.802 |
|        | V VI          | 0.198                     | 0.184  | 0.241  | 0.293  | 0.416               | 0.385 | 0.634 | 0.799 |
|        | No category   | 3.663                     | 4.839  | 4.863  | 4.493  | 0.681               | 0.809 | 1.096 | 1.411 |
| SEA    | Ia Ib II      | 2.198                     | 2.041  | 1.758  | 1.613  | 0.015               | 0.022 | 0.019 | 0.019 |
|        | III IV        | 6.501                     | 5.649  | 8.180  | 8.688  | 0.022               | 0.024 | 0.040 | 0.045 |
|        | V VI          | 2.482                     | 2.092  | 2.859  | 3.304  | 0.069               | 0.060 | 0.068 | 0.068 |
|        | No category   | 2.871                     | 2.730  | 2.907  | 3.125  | 0.088               | 0.098 | 0.143 | 0.170 |
| WAS    | Ia Ib II      | 2.719                     | 1.575  | 3.024  | 2.636  | 0.603               | 0.747 | 1.106 | 1.409 |
|        | III IV        | 0.584                     | 0.564  | 1.949  | 1.961  | 1.448               | 1.749 | 2.581 | 3.020 |
|        | V VI          | 4.826                     | 3.584  | 4.398  | 3.400  | 0.543               | 0.535 | 1.061 | 1.246 |
|        | No category   | 5.079                     | 5.675  | 5.970  | 7.417  | 1.519               | 1.714 | 2.416 | 3.010 |
| WSE    | Ia Ib II      | 5.120                     | 7.521  | 8.542  | 9.027  | 0.623               | 0.789 | 1.019 | 0.942 |
|        | III IV        | 5.303                     | 6.184  | 8.500  | 8.458  | 3.548               | 4.396 | 6.172 | 6.108 |
|        | V VI          | 4.147                     | 2.514  | 3.177  | 3.392  | 2.188               | 1.938 | 3.099 | 3.037 |
|        | No category   | 4.424                     | 4.962  | 7.042  | 7.113  | 5.082               | 6.395 | 8.673 | 8.887 |
| Global | Ia Ib II      | 3.168                     | 3.476  | 4.183  | 4.080  | 0.536               | 0.614 | 0.836 | 0.966 |
|        | III IV        | 5.891                     | 6.165  | 7.657  | 8.470  | 1.229               | 1.440 | 1.963 | 2.124 |
|        | V VI          | 3.960                     | 3.316  | 3.939  | 4.064  | 1.105               | 1.158 | 1.520 | 1.723 |
|        | No category   | 3.629                     | 5.160  | 5.385  | 5.794  | 1.337               | 1.700 | 2.152 | 2.396 |

**Table S2.** Total urban land area within the protected areas

| Region | IUCN Category | Total urban land area (km <sup>2</sup> ) |          |          |          |
|--------|---------------|------------------------------------------|----------|----------|----------|
|        |               | 1992                                     | 2000     | 2008     | 2015     |
| CAM    | Ia Ib II      | 114.39                                   | 176.71   | 197.84   | 220.43   |
|        | III IV        | 138.57                                   | 229.36   | 289.27   | 455.22   |
|        | V VI          | 56.34                                    | 450.12   | 514.23   | 548.74   |
|        | No category   | 154.45                                   | 295.16   | 594.69   | 766.36   |
| CHN    | Ia Ib II      | 0.13                                     | 0.72     | 0.84     | 1.05     |
|        | III IV        | 0.81                                     | 2.11     | 3.11     | 5.59     |
|        | V VI          | 126.16                                   | 146.18   | 367.80   | 400.28   |
|        | No category   | 61.69                                    | 79.39    | 278.68   | 418.40   |
| EAS    | Ia Ib II      | 14.60                                    | 21.50    | 24.05    | 40.87    |
|        | III IV        | 666.72                                   | 854.09   | 1113.69  | 1524.25  |
|        | V VI          | 1,224.81                                 | 1,516.44 | 1,943.17 | 3,069.95 |
|        | No category   | 1.29                                     | 2.65     | 25.79    | 53.33    |
| EEU    | Ia Ib II      | 51.98                                    | 146.26   | 326.22   | 346.73   |
|        | III IV        | 422.47                                   | 606.32   | 974.59   | 1,053.63 |
|        | V VI          | 198.93                                   | 397.26   | 912.54   | 1,012.66 |
|        | No category   | 297.45                                   | 725.83   | 2,597.20 | 3,139.71 |
| IND    | Ia Ib II      | 39.89                                    | 47.45    | 69.21    | 93.43    |
|        | III IV        | 89.73                                    | 103.87   | 183.47   | 252.82   |
|        | V VI          | 9.95                                     | 13.25    | 53.86    | 121.09   |
|        | No category   | 4.51                                     | 6.80     | 99.41    | 192.37   |
| MAF    | Ia Ib II      | 24.70                                    | 35.27    | 50.95    | 119.78   |
|        | III IV        | 14.97                                    | 20.34    | 27.28    | 37.63    |
|        | V VI          | 67.92                                    | 93.62    | 130.78   | 171.37   |
|        | No category   | 350.60                                   | 515.50   | 1,204.34 | 1,852.14 |
| MAS    | Ia Ib II      | 0.52                                     | 9.12     | 12.06    | 13.13    |
|        | III IV        | 27.99                                    | 31.78    | 38.75    | 44.94    |
|        | V VI          | -                                        | 0.20     | 0.20     | 0.20     |
|        | No category   | 1.70                                     | 8.81     | 19.21    | 27.99    |
| NAF    | Ia Ib II      | 32.51                                    | 57.78    | 77.13    | 109.76   |
|        | III IV        | 0.51                                     | 1.31     | 4.42     | 18.31    |
|        | V VI          | -                                        | 48.38    | 49.29    | 53.27    |
|        | No category   | 63.38                                    | 561.12   | 736.64   | 1,341.16 |
| NAM    | Ia Ib II      | 5.47                                     | 7.69     | 11.49    | 16.44    |
|        | III IV        | 227.49                                   | 359.39   | 455.82   | 644.55   |
|        | V VI          | 100.32                                   | 157.17   | 235.76   | 288.34   |
|        | No category   | 3,705.98                                 | 4,604.62 | 5,950.52 | 7,315.21 |
| OCE    | Ia Ib II      | 29.18                                    | 67.95    | 87.36    | 103.68   |
|        | III IV        | 43.22                                    | 64.07    | 73.78    | 97.30    |
|        | V VI          | 1.21                                     | 3.45     | 6.75     | 23.84    |
|        | No category   | 61.79                                    | 209.26   | 640.21   | 1,034.59 |
| SAF    | Ia Ib II      | 17.74                                    | 48.64    | 49.19    | 49.36    |
|        | III IV        | 5.93                                     | 6.07     | 11.96    | 18.63    |
|        | V VI          | -                                        | -        | -        | -        |
|        | No category   | 20.97                                    | 152.99   | 376.91   | 702.60   |
| SAM    | Ia Ib II      | 105.59                                   | 142.57   | 166.20   | 189.69   |

| Region | IUCN Category | Total urban land area (km <sup>2</sup> ) |           |           |           |
|--------|---------------|------------------------------------------|-----------|-----------|-----------|
|        |               | 1992                                     | 2000      | 2008      | 2015      |
|        | III IV        | 41.36                                    | 54.46     | 68.88     | 79.58     |
|        | V VI          | 328.00                                   | 595.18    | 1,038.92  | 1,305.28  |
|        | No category   | 976.91                                   | 1,929.28  | 3,204.45  | 4,044.53  |
|        | Ia Ib II      | 4.62                                     | 6.68      | 13.92     | 19.46     |
| SAS    | III IV        | 18.67                                    | 20.52     | 31.60     | 47.85     |
|        | V VI          | 28.24                                    | 31.19     | 39.68     | 52.62     |
|        | No category   | 21.85                                    | 28.65     | 60.93     | 104.54    |
|        | Ia Ib II      | 35.16                                    | 39.81     | 53.43     | 61.17     |
| SEA    | III IV        | 26.59                                    | 23.45     | 52.84     | 94.17     |
|        | V VI          | 32.02                                    | 38.72     | 49.18     | 85.87     |
|        | No category   | 49.82                                    | 85.99     | 199.88    | 340.85    |
|        | Ia Ib II      | 21.02                                    | 24.77     | 46.06     | 51.21     |
| WAS    | III IV        | 1.12                                     | 4.51      | 7.61      | 12.08     |
|        | V VI          | 112.49                                   | 131.84    | 166.70    | 215.08    |
|        | No category   | 33.72                                    | 124.91    | 168.29    | 258.43    |
|        | Ia Ib II      | 4.06                                     | 7.43      | 16.13     | 23.31     |
| WSE    | III IV        | 40.54                                    | 87.93     | 243.13    | 288.23    |
|        | V VI          | 386.62                                   | 788.83    | 1,878.60  | 2,114.49  |
|        | No category   | 364.07                                   | 875.82    | 2,247.91  | 2,536.89  |
|        | Ia Ib II      | 501.56                                   | 840.34    | 1,202.09  | 1,459.48  |
| Global | III IV        | 1,766.70                                 | 2,469.56  | 3,580.20  | 4,674.76  |
|        | V VI          | 2,673.00                                 | 4,411.83  | 7,387.47  | 9,463.08  |
|        | No category   | 6,170.18                                 | 10,206.79 | 18,405.04 | 24,129.11 |
|        | All Category  | 11,111.44                                | 17,928.51 | 30,574.80 | 39,726.43 |

**Table S3.** Total urban land area within 50-km buffer around protected areas

| Region | IUCN Category | Total urban land area (km <sup>2</sup> ) |              |              |              |
|--------|---------------|------------------------------------------|--------------|--------------|--------------|
|        |               | 1992                                     | 2000         | 2008         | 2015         |
| CAM    | Ia Ib II      | 26,396.08                                | 34,564.16    | 45,740.49    | 58,872.28    |
|        | III IV        | 7,506.41                                 | 12,374.41    | 25,735.30    | 41,934.41    |
|        | V VI          | 29,760.26                                | 43,676.41    | 72,618.19    | 113,566.65   |
|        | No category   | 27,467.67                                | 59,411.48    | 149,280.30   | 205,955.75   |
| CHN    | Ia Ib II      | 259.01                                   | 319.39       | 479.75       | 593.29       |
|        | III IV        | 5,428.24                                 | 7,272.47     | 11,652.06    | 12,468.83    |
|        | V VI          | 6,143.71                                 | 8,656.94     | 14,162.93    | 15,916.74    |
|        | No category   | 13,638.45                                | 19,055.90    | 37,776.80    | 48,757.73    |
| EAS    | Ia Ib II      | 7,465.34                                 | 10,864.30    | 17,360.81    | 27,441.48    |
|        | III IV        | 704,326.53                               | 977,536.65   | 1,535,454.42 | 2,116,323.78 |
|        | V VI          | 342,882.52                               | 413,210.11   | 549,144.28   | 755,905.07   |
|        | No category   | 643.40                                   | 5,876.84     | 12,191.17    | 27,434.24    |
| EEU    | Ia Ib II      | 36,865.67                                | 61,064.29    | 169,294.54   | 179,612.05   |
|        | III IV        | 759,458.36                               | 1,312,313.19 | 2,307,804.24 | 2,521,714.26 |
|        | V VI          | 116,099.39                               | 204,723.38   | 394,500.77   | 437,043.34   |
|        | No category   | 70,806.57                                | 230,496.88   | 1,745,649.80 | 2,097,114.97 |
| IND    | Ia Ib II      | 2,855.40                                 | 4,275.88     | 7,295.30     | 9,794.58     |
|        | III IV        | 9,289.35                                 | 11,453.56    | 22,845.02    | 32,376.24    |
|        | V VI          | 78.70                                    | 120.45       | 459.39       | 747.72       |
|        | No category   | 1,637.54                                 | 2,151.30     | 7,115.52     | 12,095.05    |
| MAF    | Ia Ib II      | 4,310.75                                 | 5,629.30     | 9,358.89     | 13,025.20    |
|        | III IV        | 3,508.81                                 | 4,510.24     | 7,140.53     | 9,991.57     |
|        | V VI          | 2,418.03                                 | 3,240.55     | 5,550.57     | 7,185.57     |
|        | No category   | 103,427.53                               | 126,552.26   | 211,476.10   | 285,709.78   |
| MAS    | Ia Ib II      | 823.04                                   | 1,598.66     | 4,075.42     | 5,283.30     |
|        | III IV        | 1,570.37                                 | 1,877.36     | 6,019.53     | 8,045.61     |
|        | V VI          | 2.44                                     | 75.88        | 110.51       | 290.34       |
|        | No category   | 767.39                                   | 1,021.32     | 2,606.50     | 3,597.17     |
| NAF    | Ia Ib II      | 410.59                                   | 702.99       | 1,206.10     | 1,516.61     |
|        | III IV        | 184.51                                   | 218.38       | 379.36       | 727.79       |
|        | V VI          | -                                        | 388.88       | 487.96       | 731.16       |
|        | No category   | 1,920.64                                 | 4,237.43     | 8,522.54     | 15,125.04    |
| NAM    | Ia Ib II      | 102,936.89                               | 145,664.26   | 217,310.87   | 268,235.67   |
|        | III IV        | 728,054.88                               | 898,644.74   | 1,102,451.21 | 1,225,504.86 |
|        | V VI          | 2,863,669.91                             | 3,987,277.06 | 6,193,140.05 | 7,563,620.49 |
|        | No category   | 240,941.45                               | 294,338.74   | 353,763.46   | 419,495.05   |
| OCE    | Ia Ib II      | 86,949.58                                | 141,252.66   | 294,473.86   | 365,629.71   |
|        | III IV        | 174,983.53                               | 278,648.67   | 395,694.33   | 526,453.91   |
|        | V VI          | 19,787.15                                | 49,424.71    | 85,597.96    | 144,767.98   |
|        | No category   | 61,172.03                                | 92,225.86    | 147,761.25   | 196,130.08   |
| SAF    | Ia Ib II      | 334.54                                   | 501.99       | 737.69       | 950.94       |
|        | III IV        | 240.76                                   | 331.94       | 357.63       | 1,092.38     |
|        | V VI          | 20.95                                    | 30.01        | 30.45        | 472.50       |
|        | No category   | 52,491.50                                | 79,987.05    | 125,065.44   | 173,057.35   |
| SAM    | Ia Ib II      | 30,045.11                                | 42,598.53    | 65,375.25    | 87,218.58    |

| Region | IUCN Category | Total urban land area (km <sup>2</sup> ) |               |               |               |
|--------|---------------|------------------------------------------|---------------|---------------|---------------|
|        |               | 1992                                     | 2000          | 2008          | 2015          |
|        | III IV        | 5,856.16                                 | 10,640.16     | 28,660.21     | 47,159.95     |
|        | V VI          | 34,954.47                                | 60,760.69     | 99,525.59     | 125,027.80    |
|        | No category   | 30,146.46                                | 63,535.10     | 129,979.77    | 235,488.93    |
|        | Ia Ib II      | 8,213.06                                 | 10,572.88     | 20,727.35     | 48,410.63     |
| SAS    | III IV        | 4,012.07                                 | 5,266.70      | 8,690.83      | 12,328.21     |
|        | V VI          | 2,090.76                                 | 2,859.55      | 5,345.26      | 7,195.06      |
|        | No category   | 14,147.29                                | 17,295.44     | 25,955.90     | 35,127.40     |
|        | Ia Ib II      | 115.98                                   | 189.21        | 200.42        | 245.19        |
| SEA    | III IV        | 78.69                                    | 102.58        | 184.20        | 308.34        |
|        | V VI          | 262.86                                   | 313.90        | 415.64        | 644.59        |
|        | No category   | 556.32                                   | 887.05        | 1,934.60      | 3,222.88      |
|        | Ia Ib II      | 3,833.04                                 | 5,813.51      | 11,075.75     | 15,467.58     |
| WAS    | III IV        | 17,597.79                                | 24,276.09     | 39,781.45     | 58,702.26     |
|        | V VI          | 2,281.59                                 | 2,911.02      | 6,610.45      | 9,113.90      |
|        | No category   | 14,222.15                                | 27,055.11     | 62,612.51     | 98,909.38     |
|        | Ia Ib II      | 56,607.72                                | 108,573.81    | 224,013.22    | 316,023.76    |
| WSE    | III IV        | 2,736,684.61                             | 4,848,074.17  | 8,747,450.21  | 9,753,880.59  |
|        | V VI          | 2,345,943.83                             | 3,771,861.93  | 6,292,641.95  | 6,909,781.83  |
|        | No category   | 249,464.48                               | 2,137,641.13  | 5,452,736.88  | 5,839,708.66  |
|        | Ia Ib II      | 368,421.80                               | 574,185.80    | 1,088,725.74  | 1,398,320.86  |
| Global | III IV        | 5,158,781.07                             | 8,393,541.32  | 14,240,300.53 | 16,369,013.00 |
|        | V VI          | 5,766,396.57                             | 8,549,531.48  | 13,720,341.95 | 16,092,010.74 |
|        | No category   | 883,450.88                               | 3,161,768.87  | 8,474,428.53  | 9,696,929.47  |
|        | All Category  | 12,177,050.31                            | 20,679,027.47 | 37,523,796.75 | 43,556,274.07 |

**Table S4.** Year-wise breakdown of the number of protected areas in each region and the number of protected areas above the threshold considered in this study.

| Region        | 1992   |                            | 2000    |                            | 2008    |                            | 2015    |                            | Total   |                            |
|---------------|--------|----------------------------|---------|----------------------------|---------|----------------------------|---------|----------------------------|---------|----------------------------|
|               | Total  | Above 0.09 km <sup>2</sup> | Total   | Above 0.09k m <sup>2</sup> | Total   | Above 0.09 km <sup>2</sup> | Total   | Above 0.09 km <sup>2</sup> | Total   | Above 0.09 km <sup>2</sup> |
| CAM           | 918    | 860                        | 1,472   | 1,337                      | 2,443   | 2,253                      | 3,087   | 2,804                      | 3,140   | 2,852                      |
| CHN           | 128    | 115                        | 170     | 151                        | 219     | 200                        | 240     | 221                        | 252     | 233                        |
| EAS           | 916    | 883                        | 1,003   | 955                        | 1,160   | 1,091                      | 1,200   | 1,127                      | 1,201   | 1,127                      |
| EEU           | 16,636 | 11,797                     | 23,048  | 16,977                     | 36,730  | 25,014                     | 40,877  | 27,462                     | 41,661  | 28,084                     |
| IND           | 124    | 124                        | 133     | 133                        | 146     | 146                        | 150     | 150                        | 150     | 150                        |
| MAF           | 5,086  | 5,016                      | 5,208   | 5,136                      | 5,607   | 5,533                      | 5,758   | 5,682                      | 5,790   | 5,713                      |
| MAS           | 157    | 157                        | 196     | 196                        | 216     | 216                        | 249     | 249                        | 249     | 249                        |
| NAF           | 197    | 196                        | 249     | 243                        | 347     | 340                        | 619     | 611                        | 620     | 612                        |
| NAM           | 22,936 | 17,630                     | 27,192  | 21,153                     | 34,326  | 26,234                     | 39,871  | 30,948                     | 39,905  | 30,979                     |
| OCE           | 9,614  | 7,247                      | 11,958  | 9,178                      | 15,249  | 11,818                     | 17,707  | 14,037                     | 17,852  | 14,167                     |
| SAF           | 1,002  | 989                        | 1,328   | 1,313                      | 1,514   | 1,490                      | 1,699   | 1,675                      | 1,727   | 1,703                      |
| SAM           | 1,217  | 1,211                      | 1,918   | 1,902                      | 3,232   | 3,107                      | 4,424   | 4,165                      | 4,709   | 4,394                      |
| SAS           | 557    | 552                        | 599     | 592                        | 720     | 708                        | 1,013   | 983                        | 1,015   | 985                        |
| SEA           | 1,431  | 1,380                      | 1,687   | 1,631                      | 1,896   | 1,832                      | 1,990   | 1,926                      | 2,005   | 1,941                      |
| WAS           | 404    | 360                        | 526     | 475                        | 708     | 641                        | 857     | 776                        | 884     | 803                        |
| WSE           | 25,106 | 17,408                     | 48,134  | 34,682                     | 72,518  | 48,219                     | 85,327  | 54,179                     | 88,662  | 55,837                     |
| <b>Global</b> | 95,315 | 71,824                     | 137,195 | 104,586                    | 194,718 | 139,077                    | 224,881 | 158,080                    | 229,763 | 160,992                    |
